# Supplementary figures and images for: Electrokinetic patterning of colloidal particles with optical landscapes
Source: Royal Society of Chemistry journal article supplement (doi:10.1039/b810787d), 2008-01-01



10µm

Supplement: b810787d.pdf [file b810787d.pdf]
